# Supplementary material
Source: PubMed Central journal article supplement (PMC7015760)
Supplement: NIHMS1056273-supplement-Supp_info.pdf [file NIHMS1056273-supplement-Supp_info.pdf]

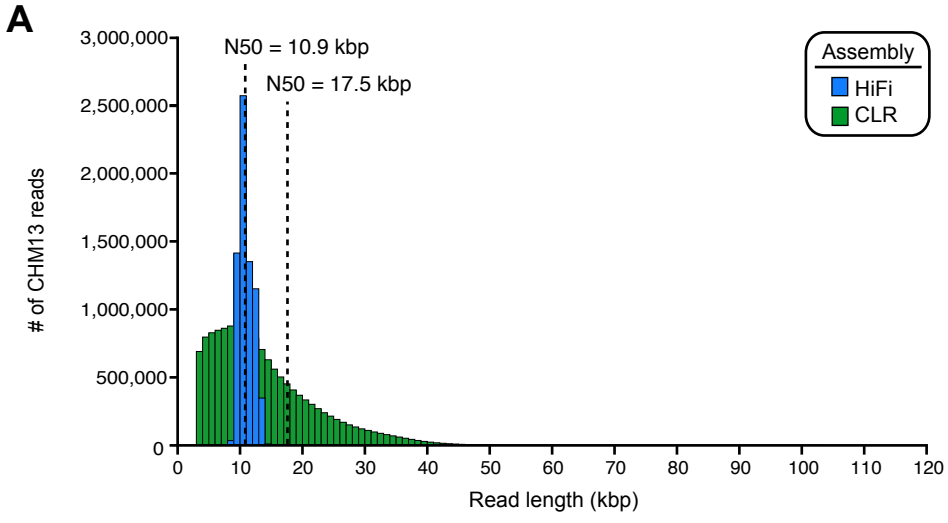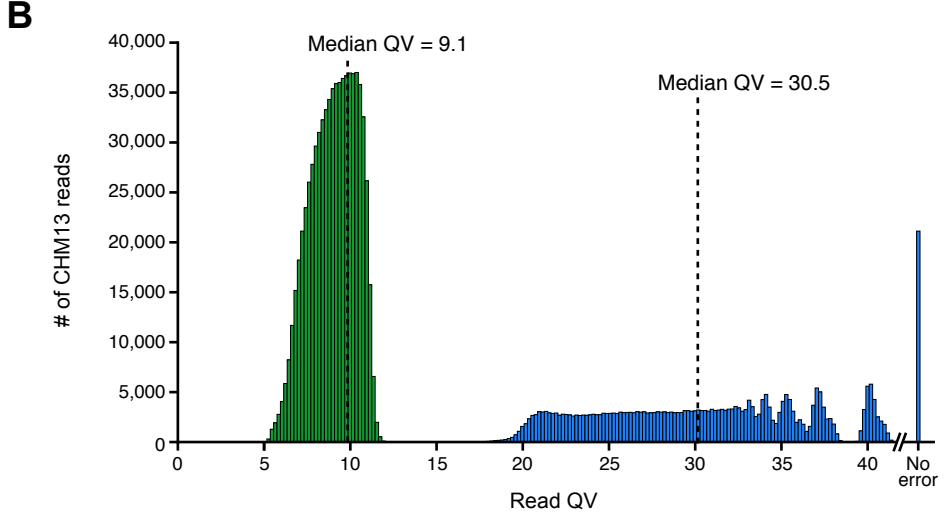

**C**

|      | Read QV (% accuracy) including indels |               | Read QV (% accuracy) excluding indels |               |
|------|---------------------------------------|---------------|---------------------------------------|---------------|
|      | Median                                | Mean          | Median                                | Mean          |
| HiFi | 30.5 (99.91%)                         | 23.4 (99.54%) | No error (100.0%)                     | 29.6 (99.89%) |
| CLR  | 9.1 (87.67%)                          | 8.8 (86.78%)  | 16.1 (97.53%)                         | 15.4 (97.10%) |

# Vollger, Logsdon et al., Figure S2

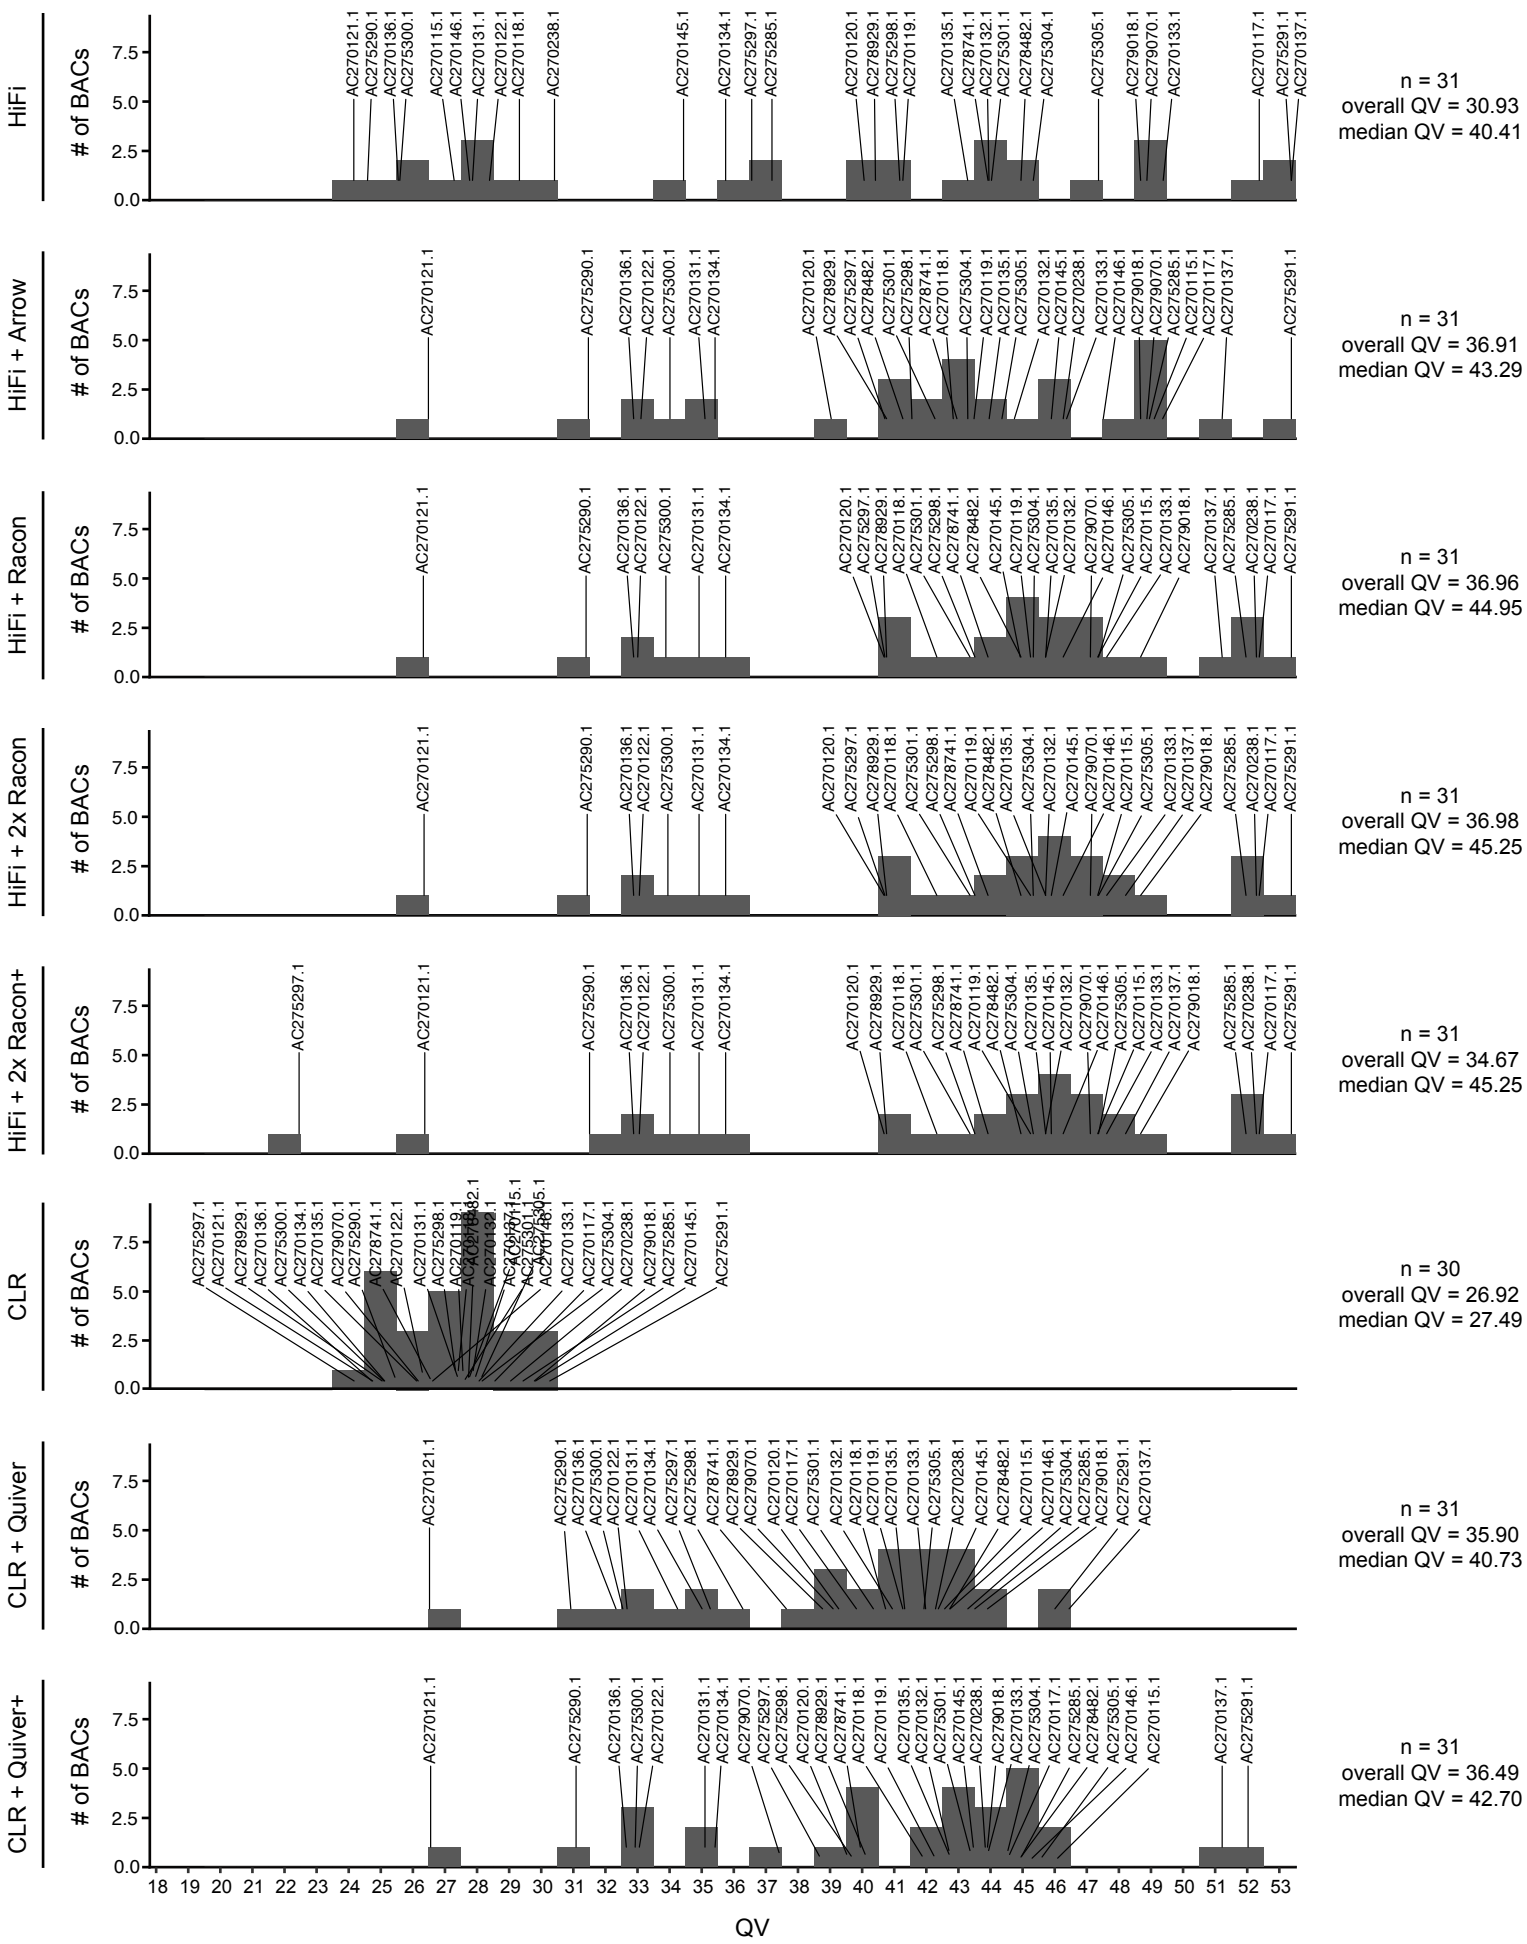

# Vollger, Logsdon et al., Figure S3

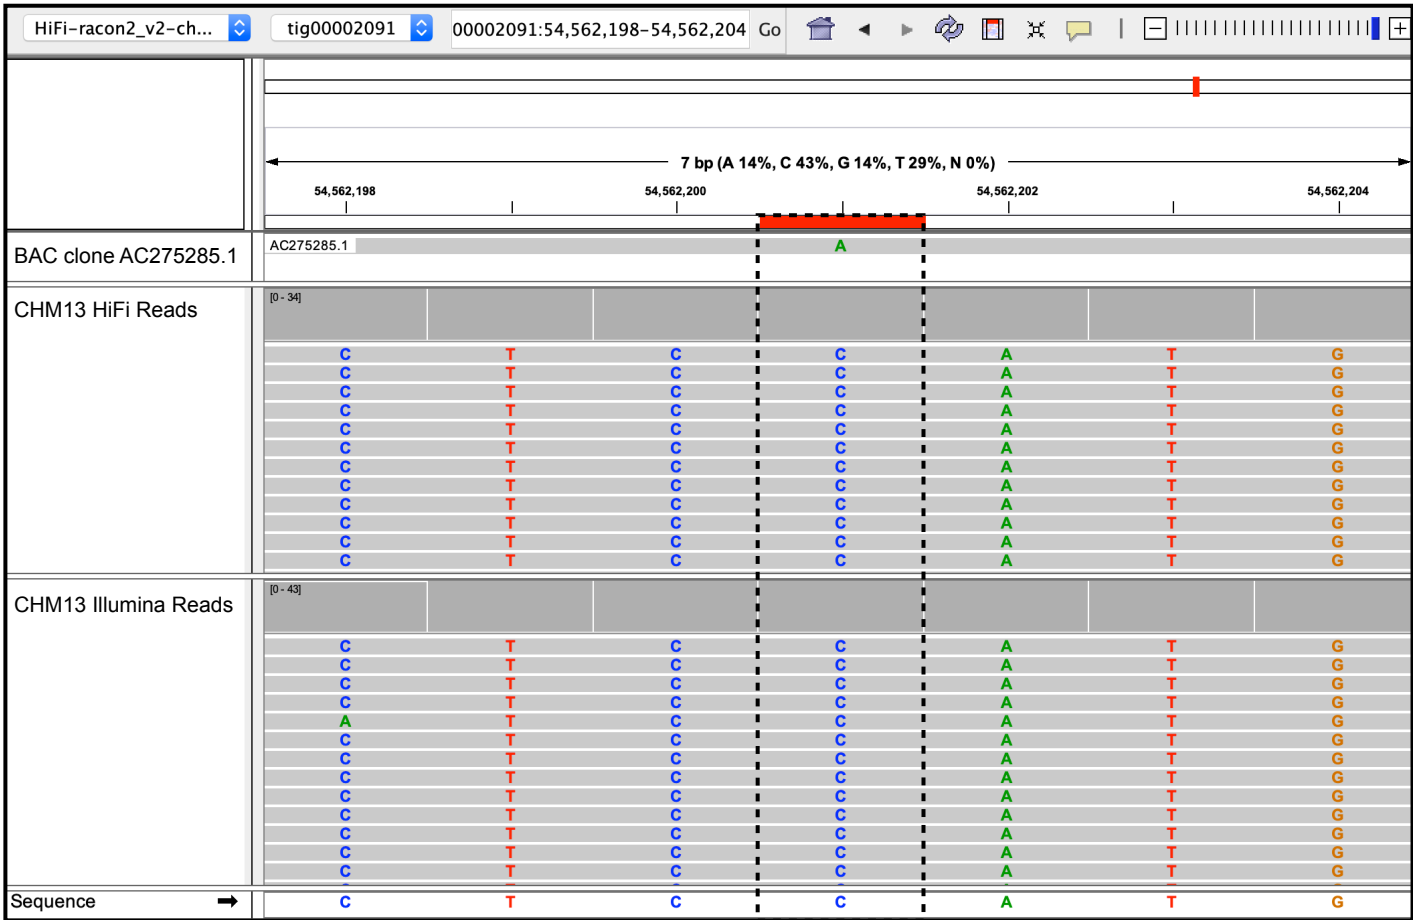

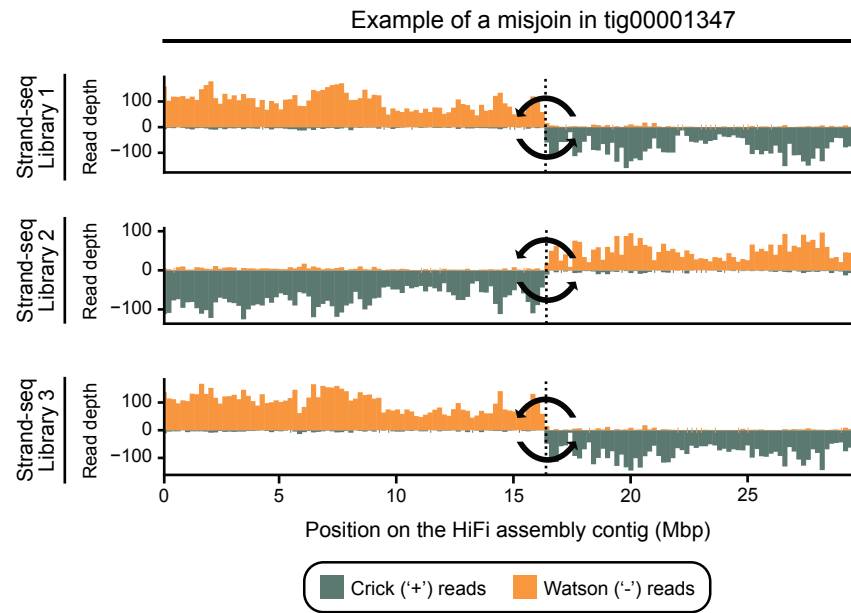

# Vollger, Logsdon et al., Figure S5

**A**

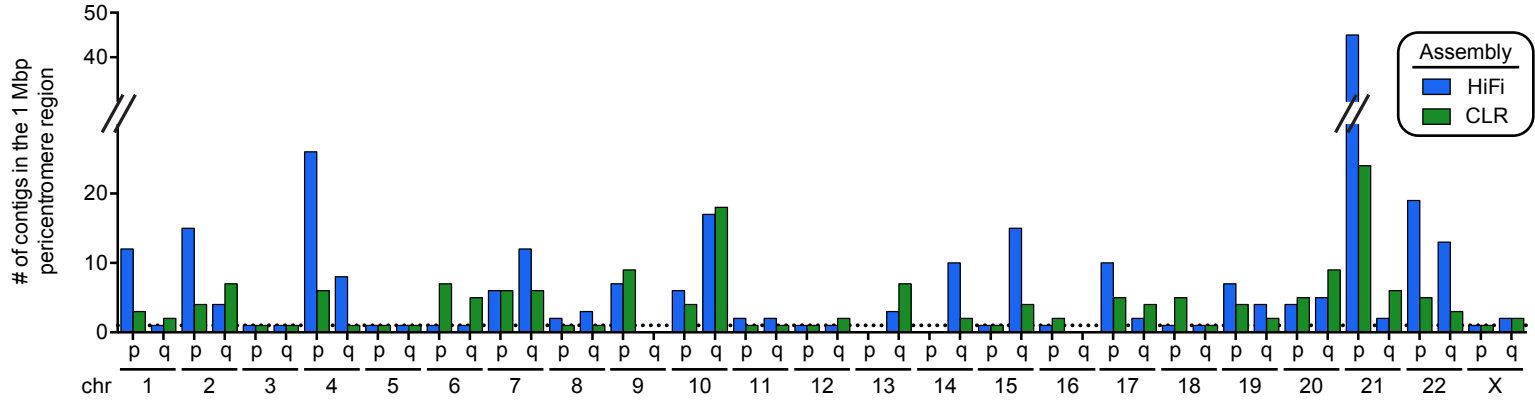

**B**

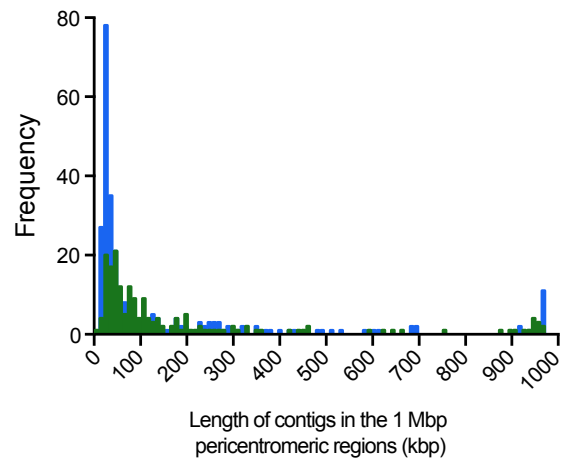

**C**

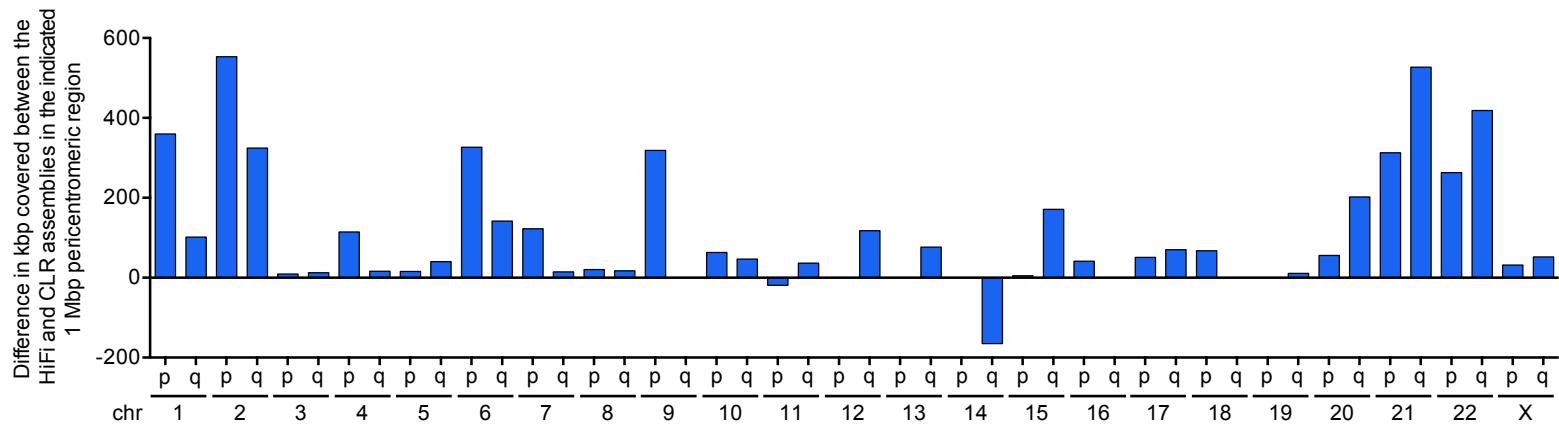

HiFi assembly SVs vs. published SVs

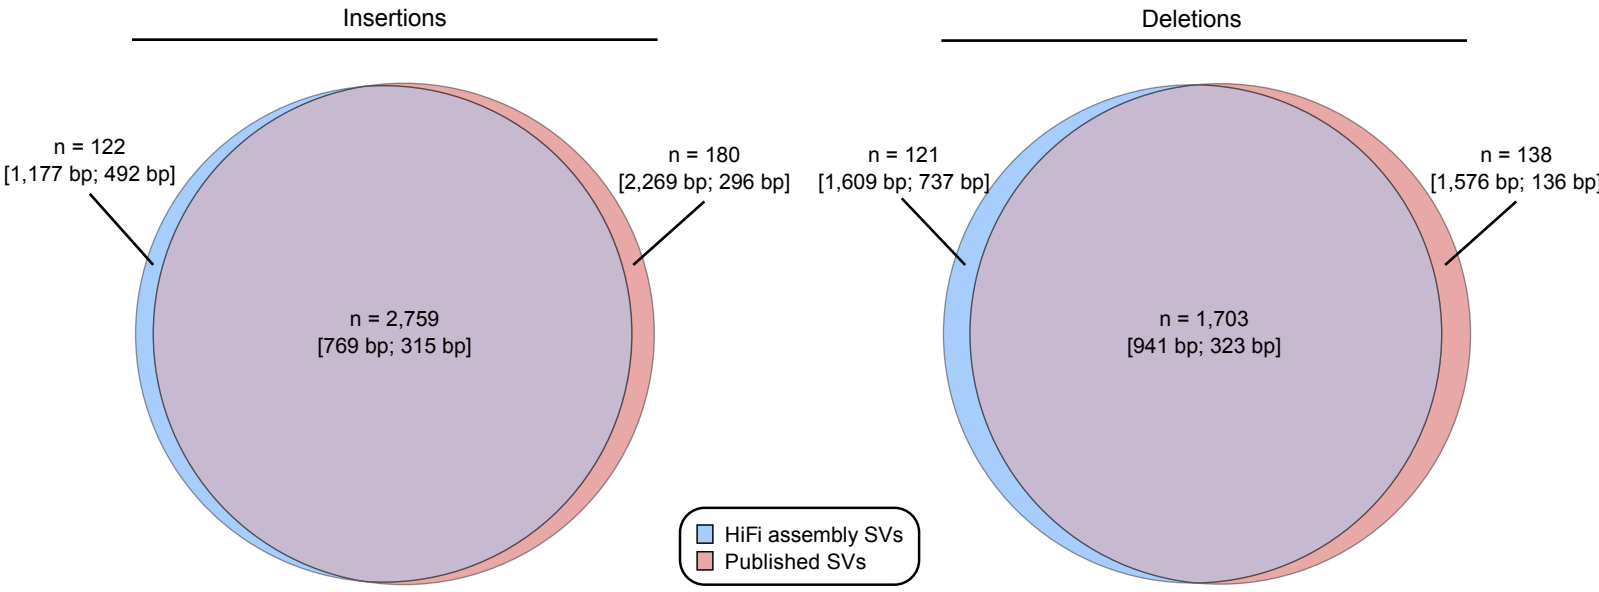

Likely gene-disrupting events in HiFi and CLR assemblies

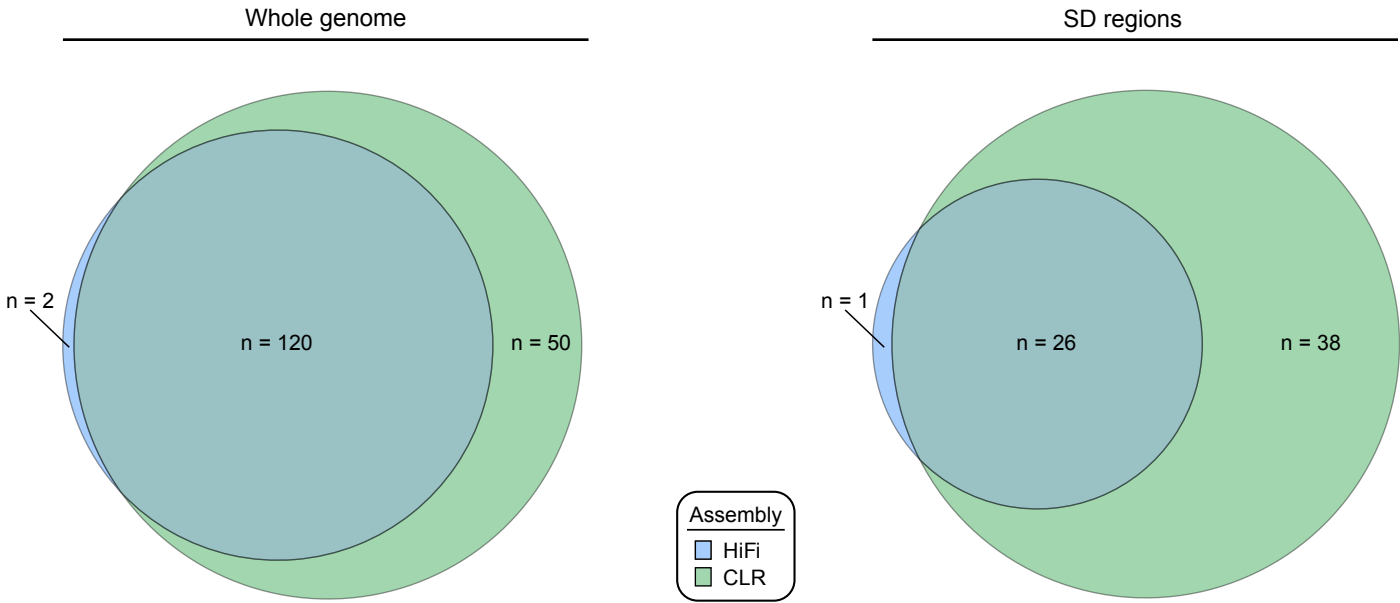

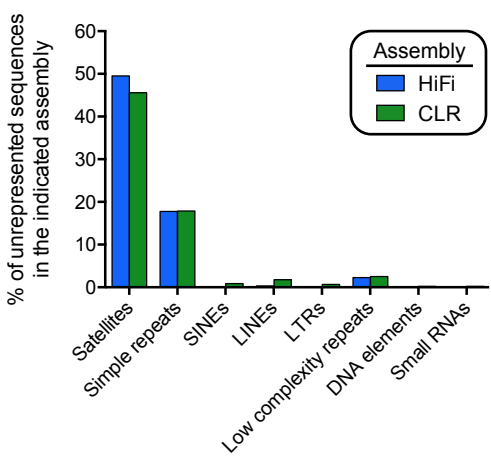



**Table S1. Statistics of the HiFi and CLR genome assemblies produced by different assemblers**

|                        | Polisher  | Total size (Gbp) | N50 (Mbp) | No. of contigs | Median QV | No. of CPU hours for assembly |
|------------------------|-----------|------------------|-----------|----------------|-----------|-------------------------------|
| <b>HiFi (24-fold)</b>  |           |                  |           |                |           |                               |
| <i>CHM13 genome</i>    |           |                  |           |                |           |                               |
| <i>Canu assembly</i>   |           |                  |           |                |           |                               |
|                        | None      | 3.03             | 25.51     | 5,296          | 40.41     | ~2,800                        |
|                        | Arrow     | 3.03             | 25.51     | 5,296          | 43.29     | ~10,000                       |
|                        | Racon     | 3.03             | 25.51     | 5,296          | 44.95     | ~2,950                        |
|                        | 2x Racon  | 3.03             | 25.51     | 5,296          | 45.25     | ~3,100                        |
|                        | 2x Racon+ | 3.03             | 25.51     | 5,296          | 45.25     | ~4,200                        |
| <b>HiFi (24-fold)</b>  |           |                  |           |                |           |                               |
| <i>CHM13 genome</i>    |           |                  |           |                |           |                               |
| <i>FALCON assembly</i> |           |                  |           |                |           |                               |
|                        | None      | 3.00             | 31.91     | 2,115          | 27.65     | ~4,400                        |
|                        | Arrow     | 3.00             | 31.92     | 2,115          | 43.45     | ~12,400                       |
|                        | 2x Racon  | 3.00             | 31.92     | 2,115          | 44.45     | ~4,700                        |
| <b>CLR (77-fold)</b>   |           |                  |           |                |           |                               |
| <i>CHM13 genome</i>    |           |                  |           |                |           |                               |
| <i>FALCON assembly</i> |           |                  |           |                |           |                               |
|                        | None      | 2.88             | 29.26     | 1,916          | 27.49     | >50,000                       |
|                        | Quiver    | 2.88             | 29.26     | 1,916          | 40.73     | >55,000                       |
|                        | Quiver+   | 2.88             | 29.26     | 1,916          | 42.70     | >55,000                       |
| <b>CLR (24-fold)</b>   |           |                  |           |                |           |                               |
| <i>CHM13 genome</i>    |           |                  |           |                |           |                               |
| <i>Canu assembly</i>   |           |                  |           |                |           |                               |
|                        | None      | 2.48             | 0.31      | 21,167         | 26.50     | ~37,300                       |

HiFi: HiFi assembly

CLR: CLR assembly

2x Racon: Two rounds of Racon

2x Racon+: Two rounds of Racon and one round of Pilon

Quiver+: Quiver, Pilon, and FreeBayes-based indel correction

Median QV: Median QV over 31 BACs

Table S2. False joins identified by Strand-seq within *de novo* assembly contigs

|                        | Contig         | Start coordinate | End coordinate | No. of false joins |
|------------------------|----------------|------------------|----------------|--------------------|
| <b>HiFi</b>            |                |                  |                |                    |
| <i>CHM13 genome</i>    |                |                  |                |                    |
| <i>Canu assembly</i>   |                |                  |                |                    |
|                        | tig00000017    | 99,602,681       | 99,618,276     | 1                  |
|                        | tig00001347    | 16,388,858       | 16,426,941     | 1                  |
|                        | tig00003369    | 22,812,690       | 22,841,943     | 1                  |
|                        | tig00002385    | 3,056,424        | 3,204,103      | 1                  |
|                        | tig00002385    | 10,092,563       | 10,210,819     | 1                  |
|                        | tig00001433    | 2,544,909        | 2,612,082      | 1                  |
|                        | tig00004976    | 785,171          | 805,928        | 1                  |
| <b>CLR</b>             |                |                  |                |                    |
| <i>CHM13 genome</i>    |                |                  |                |                    |
| <i>FALCON assembly</i> |                |                  |                |                    |
|                        | NTIA01000004.1 | 51,797,117       | 51,869,304     | 1                  |
|                        | NTIA01000039.1 | 16,068,231       | 16,072,573     | 1                  |
|                        | NTIA01000061.1 | 12,087,358       | 12,166,683     | 1                  |
|                        | NTIA01000067.1 | 4,639,556        | 4,640,945      | 1                  |
|                        | NTIA01000093.1 | 746,665          | 783,795        | 1                  |

HiFi: HiFi assembly  
CLR: CLR assembly

**Table S3. Comparison of PSVs linked with SDA in HiFi and CLR assemblies**

| Locus           | Expected no. of paralogs | Expected no. of phased bases (kbp) | No. of paralogs by SDA (HiFi, CLR) | No. of bases phased by SDA (HiFi, CLR; kbp) | Average length of SDA-phased block (HiFi, CLR; kbp) | No. of PSVs (HiFi, CLR) |
|-----------------|--------------------------|------------------------------------|------------------------------------|---------------------------------------------|-----------------------------------------------------|-------------------------|
| <i>OPN1LW</i>   | 2                        | 70                                 | 0, 1                               | 0, 20                                       | 0, 20                                               | 0, 14                   |
| <i>NOTCH2NL</i> | 5                        | 500                                | 9, 4                               | 443, 345                                    | 49, 86                                              | 728, 482                |
| <i>SRGAP2</i>   | 4                        | 520                                | 5, 5                               | 493, 494                                    | 99, 99                                              | 1194, 821               |
| <i>FCGR2/3</i>  | 3                        | 220                                | 3, 4                               | 141, 140                                    | 47, 35                                              | 611, 139                |
| <i>KANSL1</i>   | 2                        | 280                                | 4, 3                               | 54, 150                                     | 13, 50                                              | 48, 92                  |
